# Supplementary material for: Spectroscopic and Thermal Characterization of Extra Virgin Olive Oil Adulterated with Edible Oils
Source: MDPI journal article supplement (doi:10.3390/foods11091304), 2022-04-29
Supplement: s1 [file s1]

# Spectroscopic and thermal characterization of extra virgin olive oil adulterated with edible oils

Emigdio Chavez-Angel<sup>1,\*</sup>, Blanca Puertas<sup>2</sup>, Martin Kreuzer<sup>3</sup>, Robert Soliva Fortuny<sup>4</sup>, Ryan C. Ng<sup>1</sup>, Alejandro Castro-Alvarez<sup>5</sup> and Clivia M. Sotomayor Torres<sup>1,6</sup>

<sup>1</sup>Catalan Institute of Nanoscience and Nanotechnology (ICN2), CSIC and BIST, Campus UAB, Bellaterra, 08193 Barcelona, Spain.

<sup>2</sup>Departamento de calidad, Döehler Fraga, member of Döehler group, Collidors S/N, E-22520 Fraga, Spain.

<sup>3</sup>ALBA Synchrotron Light Source Experiment Division – MIRAS Beamline Cerdanyola del Valles, 08290 Barcelona, Spain.

<sup>4</sup>Department of Food Technology, University of Lleida – Agrotecnio-CeRCA Center, 25198 Lleida, Spain.

<sup>5</sup>Laboratorio de Bioproductos Farmacéuticos y Cosméticos, Centro de Excelencia en Medicina Traslacional, Facultad de Medicina, Universidad de La Frontera, Av. Francisco Salazar 01145, Temuco 4780000, Chile.

<sup>6</sup>ICREA, Pg. Lluís Companys 23, 08010 Barcelona, Spain.

\* Correspondence: emigdio.chavez@icn2.cat (ECA) Alejandro.castro.a@ufrontera.cl (ACA)

## Sample preparation

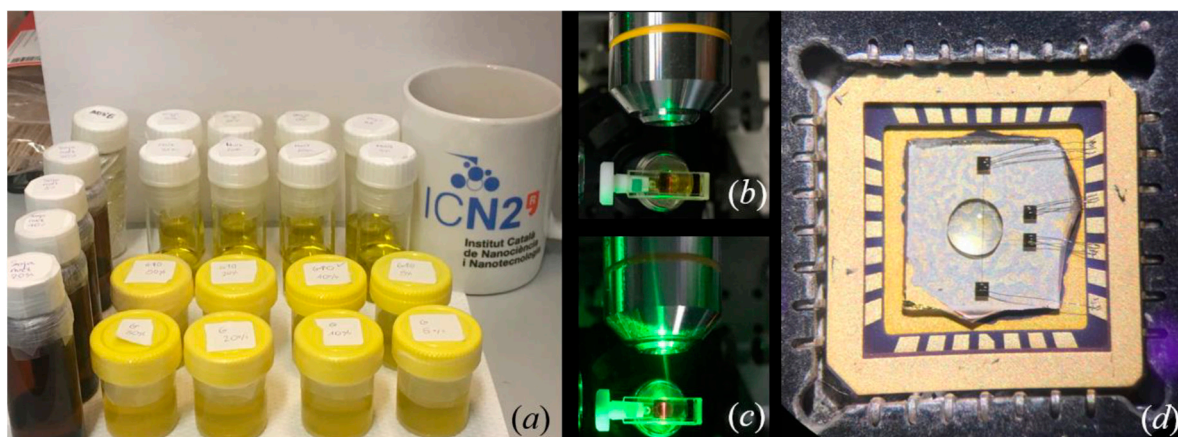

**Figure S1.** (a) All the samples used in this study, (b) and (c) quartz cuvette for Raman spectroscopy and photoluminescence showing the luminescence created by the green laser. (d) three-omega chip for thermal characterization.

## Infrared analysis

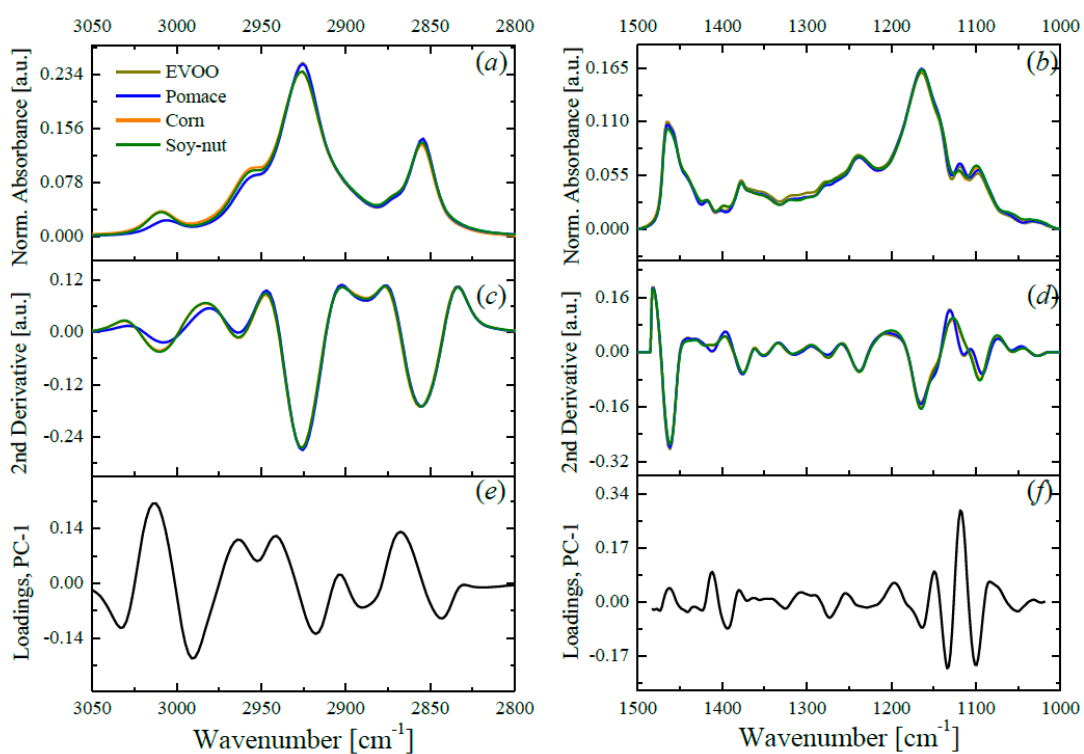

**Figure S2.** IR spectra second derivative and pc loading of EVOO, pomace, corn, and soy-nut oils.

### Photoluminescence analysis

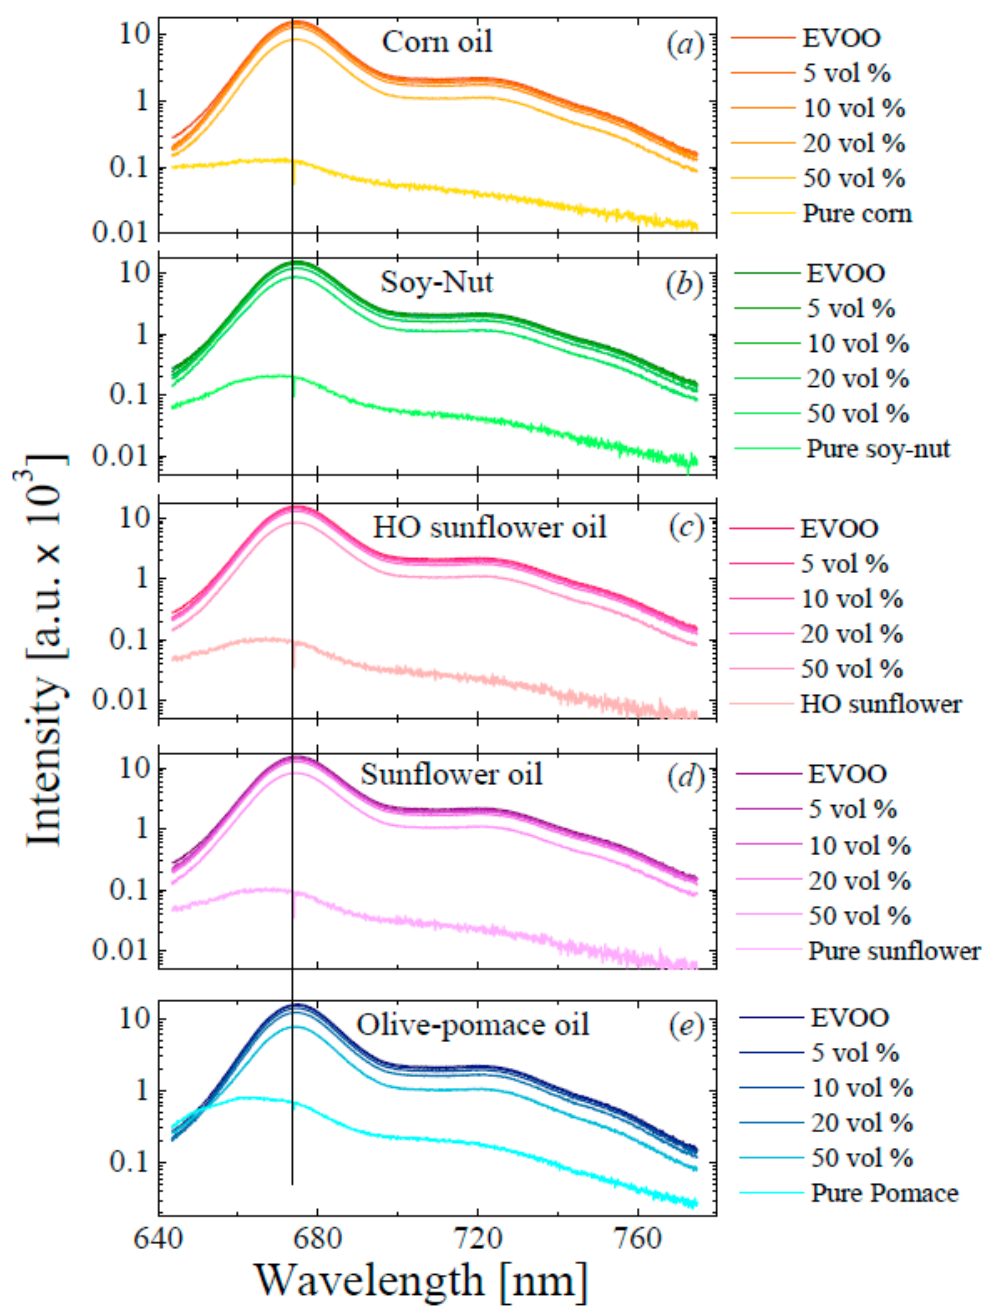

**Figure S3.** Photoluminescence of EVOO adulterated with different concentrations of: (a) corn, (b) soy-nut blend, (c) high oleic sunflower, (d) sunflower oils, and (e) olive-pomace oils.

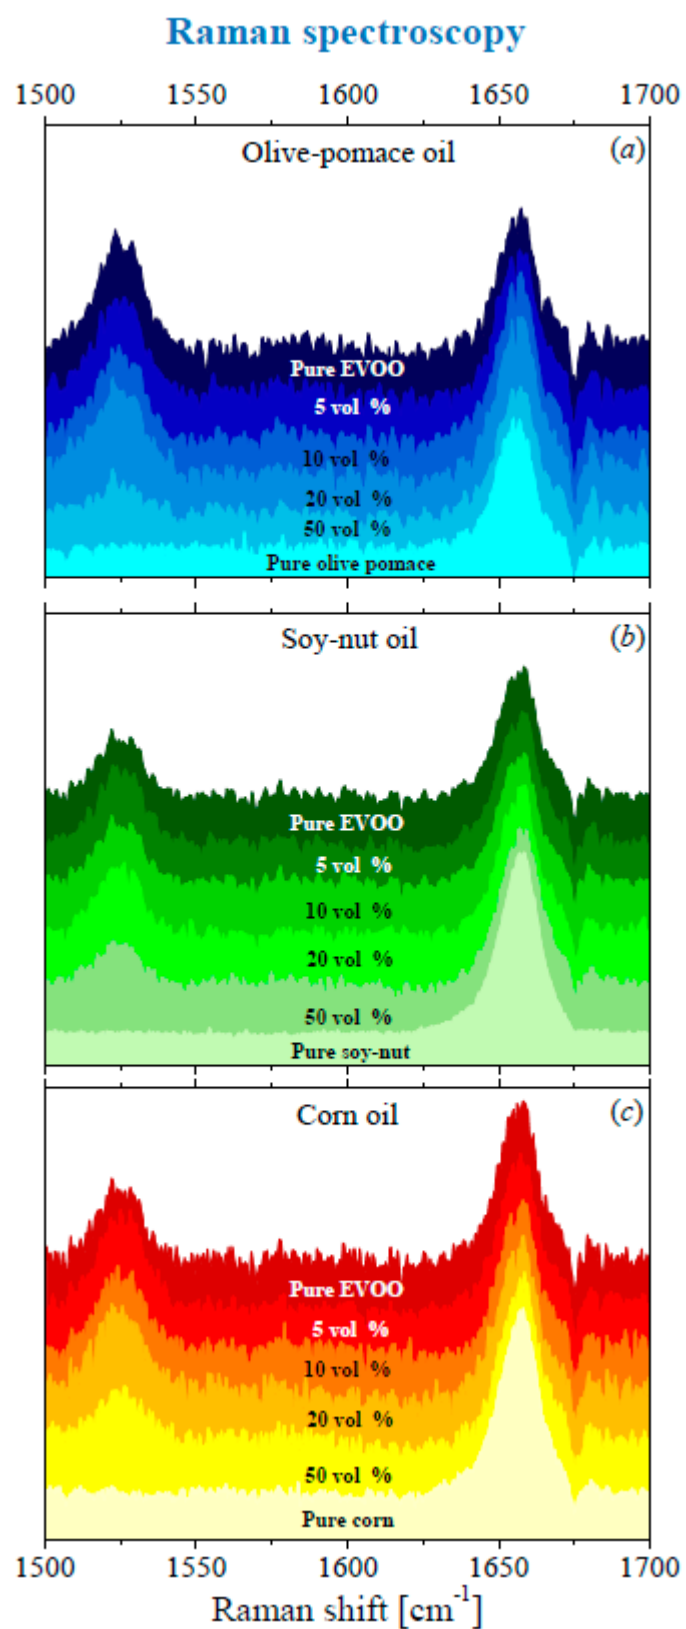

**Figure S4.** Normalized Raman spectra of EVOO adulterated with different concentrations of: (a) olive-pomace, (b) soy-nut blend, and (c) corn oils.

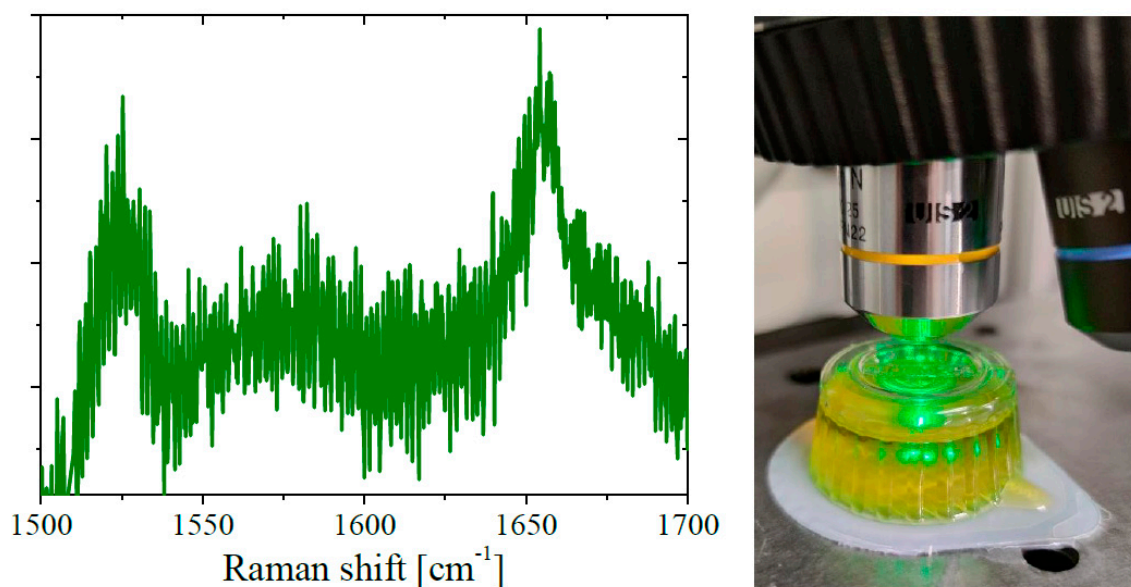

**Figure S5.** Normalized Raman spectra of EVOO measured directly from its package.

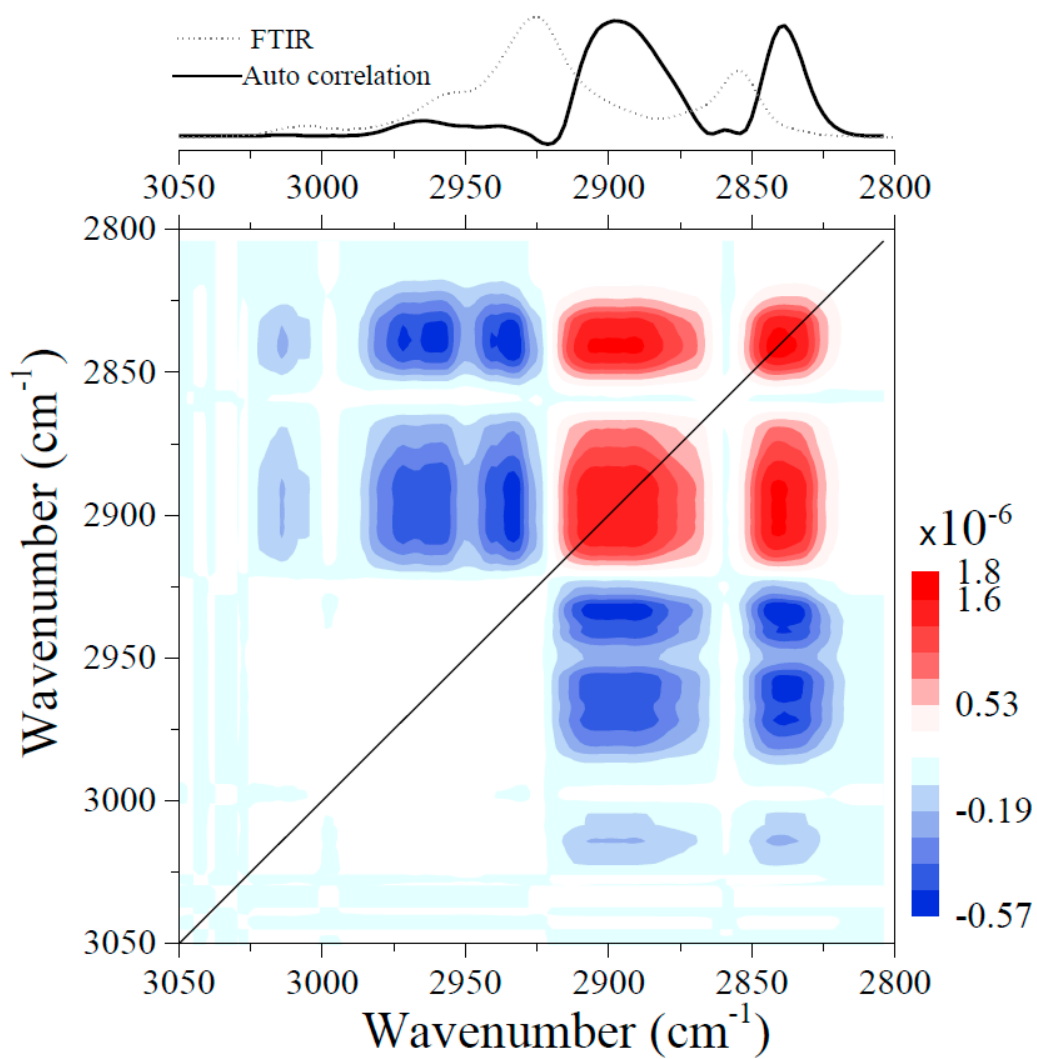

**Figure S6.** 2DCOS map of pure EVOO.

**Table S1.** schematic representation of FTIR dataset for principal component analysis.

| Wavenumber<br>(cm <sup>-1</sup> )<br>Sample | 3048                  | 3047                  | 3046                  | 3045                  | 3044                  | · | · | · |
|---------------------------------------------|-----------------------|-----------------------|-----------------------|-----------------------|-----------------------|---|---|---|
| EVOO 1                                      | I <sub>1, 3048</sub>  | I <sub>1, 3047</sub>  | I <sub>1, 3046</sub>  | I <sub>1, 3045</sub>  | I <sub>1, 3044</sub>  | · | · | · |
| EVOO 2                                      | I <sub>2, 3048</sub>  | I <sub>2, 3047</sub>  | I <sub>2, 3046</sub>  | I <sub>2, 3045</sub>  | I <sub>2, 3044</sub>  | · | · | · |
| EVOO 3                                      | I <sub>3, 3048</sub>  | I <sub>3, 3047</sub>  | I <sub>3, 3046</sub>  | I <sub>3, 3045</sub>  | I <sub>3, 3044</sub>  | · | · | · |
| ·                                           | ·                     | ·                     | ·                     | ·                     | ·                     |   |   |   |
| ·                                           | ·                     | ·                     | ·                     | ·                     | ·                     |   |   |   |
| ·                                           | ·                     | ·                     | ·                     | ·                     | ·                     |   |   |   |
| EVOO 49                                     | I <sub>49, 3048</sub> | I <sub>49, 3047</sub> | I <sub>49, 3046</sub> | I <sub>49, 3045</sub> | I <sub>49, 3044</sub> | · | · | · |
| EVOO 50                                     | I <sub>50, 3048</sub> | I <sub>50, 3047</sub> | I <sub>50, 3046</sub> | I <sub>50, 3045</sub> | I <sub>50, 3044</sub> | · | · | · |

**Table S2.** Acid content of the studied edible oils [1].

| Oils             | Acid content  |               |               |                |
|------------------|---------------|---------------|---------------|----------------|
|                  | PA<br>(C16:0) | OA<br>(C18:1) | LA<br>(C18:2) | ALA<br>(C18:3) |
| Corn             | 8.6-16.5 %    | 20-42.2%      | 34.0-65.6 %   | < 2 %          |
| Soy              | 8-13.5 %      | 17-30 %       | 48-59 %       | 4.5-11 %       |
| HO<br>Sunflower  | 2.6-5 %       | 75-90.7 %     | 2.1-17 %      | < 0.3 %        |
| EVOO             | 7.5-20 %      | 55-83 %       | 3.5-21 %      | < 1.5 %        |
| Olive-<br>Pomace | 7.5-20 %      | 55-83 %       | 3.5-21 %      | < 1.5 %        |

## References

1. FAO. Codex standard for fats and oils from vegetable sources. (1999).
